# Supplementary material for: The Complete Mitochondrial Genome of the Chicken Body Louse, Menacanthus cornutus, and Evolutionary Patterns of Extensive Gene Rearrangements in the Mitochondrial Genomes of Amblycera (Psocodea: Phthiraptera)
Source: MDPI journal article supplement (doi:10.3390/genes13030522), 2022-03-16
Supplement: s1 [file s1]

## Supplementary materials

**Table S1.** Structure of *Menacanthus cornutus* mitochondrial genome.

| Gene         | Strand | Position    | Size<br>(bp) | Start<br>Codon | Stop<br>Codon | Anticodon | Intergenic<br>Nucleotide |
|--------------|--------|-------------|--------------|----------------|---------------|-----------|--------------------------|
| <i>COI</i>   | +      | 1-1548      | 1548         | ATT            | TAG           |           | -5                       |
| <i>trnL1</i> | +      | 1547-1610   | 64           |                |               | TAG       | -2                       |
| <i>trnP</i>  | -      | 1612-1668   | 57           |                |               | TGG       | 1                        |
| <i>trnM1</i> | -      | 1745-1814   | 70           |                |               | CAT       | 76                       |
| <i>trnV</i>  | +      | 1857-1914   | 58           |                |               | TAC       | 42                       |
| <i>trnW</i>  | +      | 1919-1979   | 61           |                |               | TCA       | 4                        |
| <i>ND1</i>   | +      | 1980-2921   | 942          | TTG            | TAA           |           | 0                        |
| <i>trnD</i>  | -      | 2919-2982   | 64           |                |               | GTC       | -3                       |
| <i>trnT</i>  | +      | 2986-3043   | 58           |                |               | TGT       | 3                        |
| <i>trnR</i>  | -      | 3047-3106   | 60           |                |               | TCG       | 3                        |
| <i>trnS2</i> | +      | 3110-3172   | 63           |                |               | TGA       | 3                        |
| <i>srRNA</i> | +      | 3173-3972   | 800          |                |               |           | 0                        |
| <i>COIII</i> | +      | 3973-4779   | 807          | ATT            | TAG           |           | 0                        |
| <i>trnY</i>  | +      | 4778-4841   | 64           |                |               | GTA       | -2                       |
| <i>ND5</i>   | -      | 4842-6455   | 1614         | ATT            | TAG           |           | 0                        |
| <i>trnL2</i> | +      | 6457-6518   | 62           |                |               | TAA       | 1                        |
| <i>CytB</i>  | +      | 6569-7642   | 1074         | ATA            | TAA           |           | 50                       |
| <i>trnH</i>  | +      | 7646-7705   | 60           |                |               | GTG       | 3                        |
| <i>ATP6</i>  | -      | 7755-8396   | 642          | ATG            | TAA           |           | 49                       |
| <i>ATP8</i>  | -      | 8390-8554   | 165          | ATT            | TAA           |           | -7                       |
| <i>trnN</i>  | -      | 8555-8622   | 68           |                |               | GTT       | 0                        |
| <i>ND3</i>   | +      | 8624-8977   | 354          | ATT            | TAA           |           | 1                        |
| <i>trnM2</i> | -      | 8975-9043   | 69           |                |               | CAT       | -3                       |
| <i>trnA</i>  | +      | 9053-9106   | 54           |                |               | TGC       | 9                        |
| <i>ND4L</i>  | +      | 9128-9403   | 276          | ATT            | TAA           |           | 21                       |
| <i>ND4</i>   | +      | 9405-10730  | 1326         | ATA            | TAA           |           | 1                        |
| <i>ND6</i>   | +      | 10783-11244 | 462          | ATC            | TAA           |           | 52                       |
| <i>trnF</i>  | +      | 11249-11314 | 66           |                |               | GAA       | 4                        |
| <i>trnC</i>  | -      | 11403-11466 | 64           |                |               | GCA       | 88                       |
| <i>CR</i>    |        | 11467-12337 | 871          |                |               |           | 0                        |
| <i>trnK</i>  | -      | 12338-12400 | 63           |                |               | TTT       | 0                        |
| <i>trnQ</i>  | -      | 12472-12538 | 67           |                |               | TTG       | 71                       |
| <i>ND2</i>   | +      | 12623-13576 | 954          | ATT            | TAA           |           | 84                       |
| <i>trnE</i>  | +      | 13578-13641 | 64           |                |               | TTC       | 1                        |
| <i>trnG</i>  | +      | 13644-13705 | 62           |                |               | TCC       | 2                        |
| <i>trnI</i>  | +      | 13719-13783 | 65           |                |               | GAT       | 13                       |
| <i>lrRNA</i> | +      | 13784-14946 | 1163         |                |               |           | 0                        |
| <i>trnS1</i> | +      | 14947-15002 | 56           |                |               | TCT       | 0                        |
| <i>COII</i>  | +      | 15003-5     | 696          | ATT            | TAA           |           | 0                        |

**Table S2.** Nucleotide composition of *Menacanthus cornutus* mitochondrial genome.

|                | A%   | C%   | G%   | T(U)% | AT%  | AT-Skew | GC-Skew | size (bp) |
|----------------|------|------|------|-------|------|---------|---------|-----------|
| Whole genome   | 35.0 | 12.6 | 13.2 | 39.1  | 74.1 | -0.055  | 0.023   | 15693     |
| Control region | 36.1 | 11.6 | 11.6 | 40.8  | 76.9 | -0.061  | 0.000   | 871       |
| PCGs           | 31.4 | 12.7 | 13.5 | 42.4  | 73.8 | -0.149  | 0.031   | 10860     |
| PCGs (J)       | 31.4 | 13.4 | 13.6 | 42.2  | 73.6 | -0.147  | 0.007   | 8439      |
| PCGs (N)       | 32.5 | 11.2 | 13.1 | 43.2  | 75.7 | -0.141  | 0.078   | 2421      |
| tRNAs          | 39.0 | 12.2 | 14.7 | 34.1  | 73.1 | 0.067   | 0.093   | 1439      |
| tRNAs (J)      | 37.9 | 12.7 | 15.8 | 33.6  | 71.5 | 0.060   | 0.109   | 857       |
| tRNAs (N)      | 40.5 | 11.3 | 13.2 | 34.9  | 75.4 | 0.074   | 0.078   | 582       |
| rRNAs          | 39.3 | 11.2 | 15.1 | 34.4  | 73.7 | 0.066   | 0.148   | 1963      |

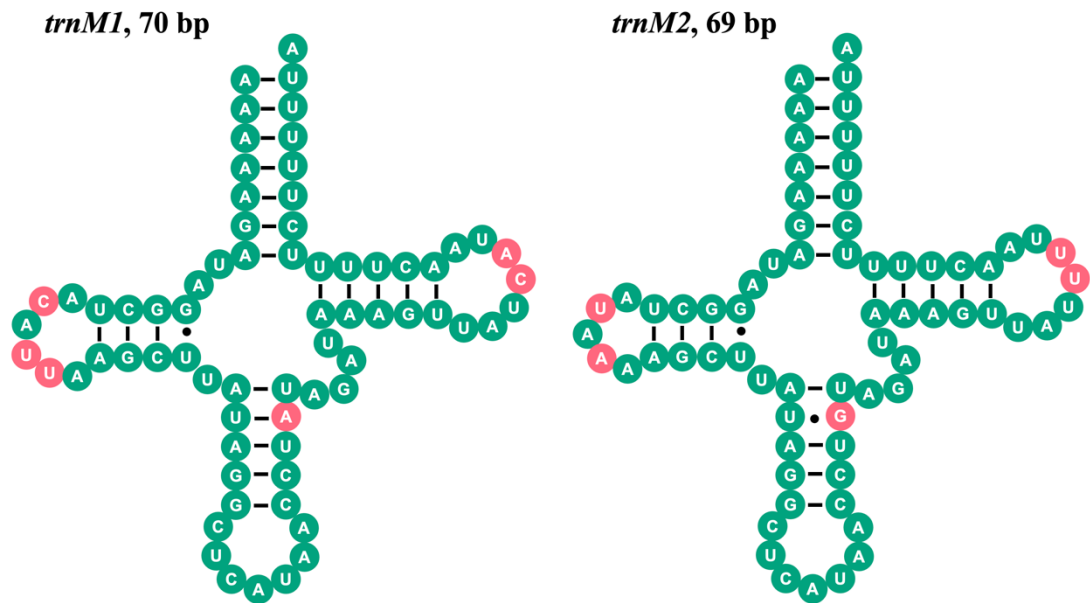

**Figure S1.** Secondary structures and sequence similarity of *trnM1* and *trnM2*. Inferred Watson-Crick bonds are illustrated by lines and GU bonds are illustrated by dots. The identical nucleotides between *trnM1* and *trnM2* are labeled with green circles and the variable sites are in pink.
